# Supplementary material
Source: PubMed Central journal article supplement (PMC8380804)
Supplement: Suppl_FigS1.pdf [file Suppl_FigS1.pdf]

Supplementary Data

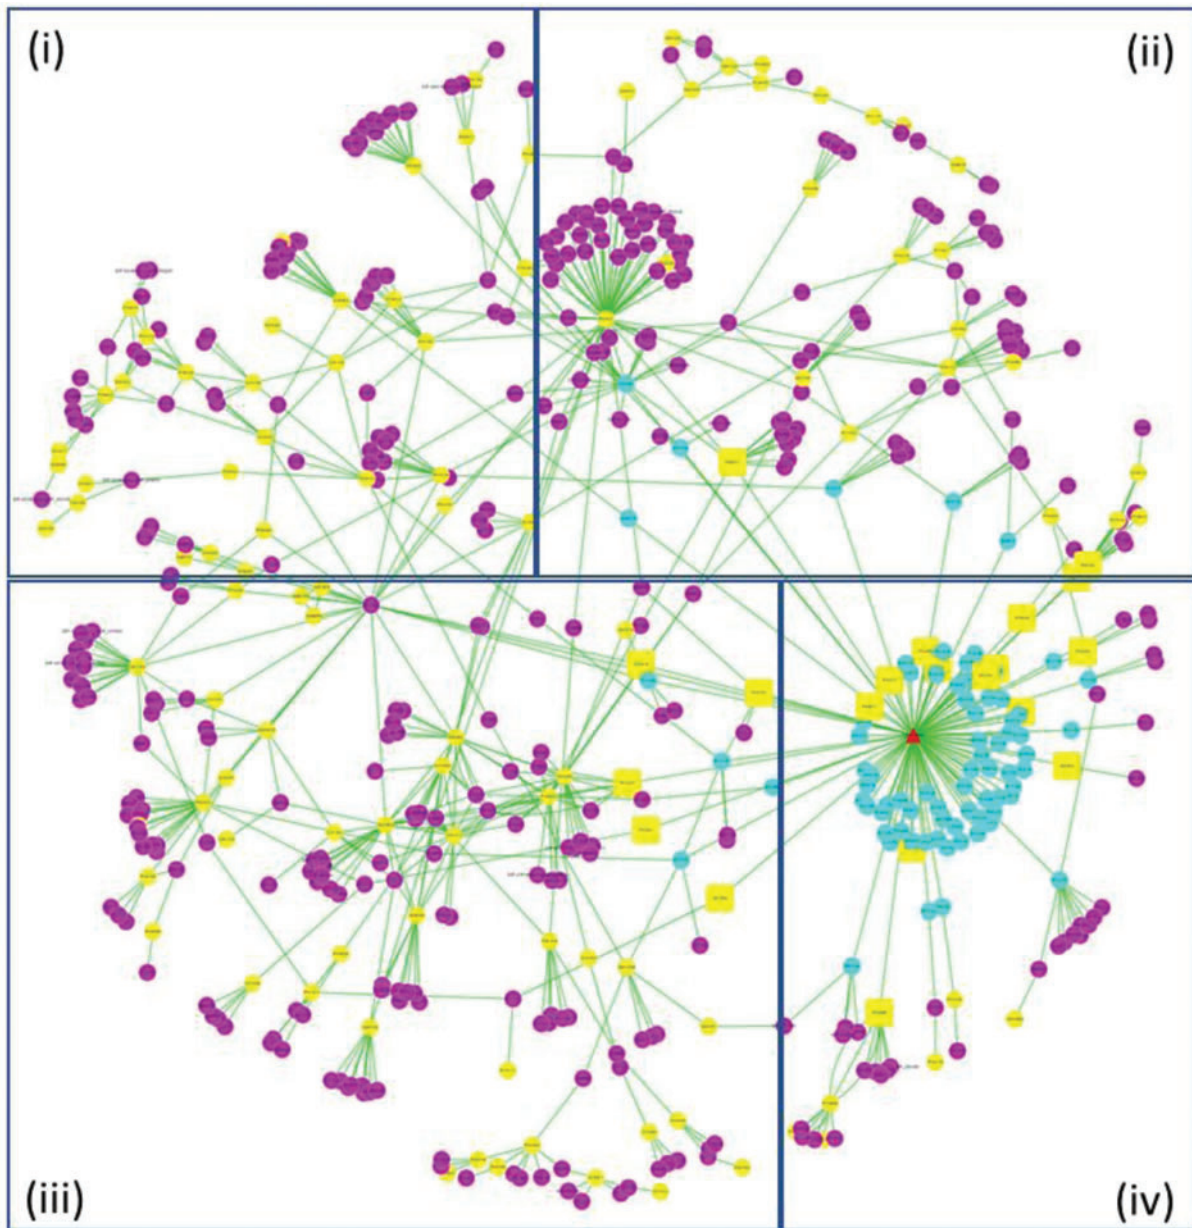

**SUPPLEMENTARY FIG. S1.** Divided view of Figure 1 “CBD-target-inflammation network.”
