# Supplementary material
Source: PubMed Central journal article supplement (PMC8380804)
Supplement: Suppl_TableS1.pdf [file Suppl_TableS1.pdf]

**Supplementary Table S1. Total Analysis of Topological Parameters of Potential Targets in “Compound-Target-Disease” Network**

| UniProt ID | Protein name                                               | Betweenness centrality | Closeness centrality | Degree |
|------------|------------------------------------------------------------|------------------------|----------------------|--------|
| P04637     | Cellular tumor antigen p53                                 | 0.304623               | 0.301269             | 58     |
| Q9Y6K9     | NF-kappa-B essential modulator                             | 0.064826               | 0.250219             | 21     |
| Q9Y4K3     | TNF receptor-associated factor 6                           | 0.064373               | 0.237797             | 20     |
| Q04206     | Transcription factor p65                                   | 0.032397               | 0.251323             | 19     |
| P19838     | Nuclear factor NF-kappa-B p105 subunit                     | 0.047215               | 0.24686              | 19     |
| P25963     | NF-kappa-B inhibitor alpha                                 | 0.042616               | 0.247181             | 18     |
| O15111     | Inhibitor of nuclear factor kappa-B kinase subunit alpha   | 0.0196                 | 0.234086             | 18     |
| P00533     | Epidermal growth factor receptor                           | 0.059172               | 0.24276              | 17     |
| P31749     | RAC-alpha serine/threonine-protein kinase                  | 0.045702               | 0.265363             | 13     |
| O14920     | Inhibitor of nuclear factor kappa-B kinase subunit beta    | 0.024162               | 0.24569              | 13     |
| P05412     | Transcription factor AP-1                                  | 0.040425               | 0.232179             | 13     |
| Q99558     | Mitogen-activated protein kinase kinase kinase 14          | 0.024606               | 0.230024             | 13     |
| P09874     | Poly [ADP-ribose] polymerase 1                             | 0.102009               | 0.286432             | 12     |
| Q16665     | Hypoxia-inducible factor 1-alpha                           | 0.033271               | 0.225475             | 12     |
| P24385     | G1/S-specific cyclin-D1                                    | 0.034723               | 0.244111             | 10     |
| Q99759     | Mitogen-activated protein kinase kinase kinase 3           | 0.027914               | 0.19937              | 10     |
| P35968     | Vascular endothelial growth factor receptor 2              | 0.041569               | 0.240709             | 9      |
| P25445     | Tumor necrosis factor receptor superfamily member 6        | 0.045595               | 0.233415             | 9      |
| P19438     | Tumor necrosis factor receptor superfamily member 1A       | 0.028184               | 0.200704             | 9      |
| P41182     | B cell lymphoma 6 protein                                  | 0.035707               | 0.236025             | 8      |
| P04150     | Glucocorticoid receptor                                    | 0.038264               | 0.19979              | 8      |
| P41279     | Mitogen-activated protein kinase kinase kinase 8           | 0.059232               | 0.255262             | 7      |
| Q13546     | Receptor-interacting serine/threonine-protein kinase 1     | 0.092458               | 0.247181             | 7      |
| P25025     | C-X-C chemokine receptor type 2                            | 0.01742                | 0.239899             | 7      |
| O15350     | Tumor protein p73                                          | 0.008025               | 0.230676             | 7      |
| Q9HCN6     | Platelet glycoprotein VI                                   | 0.075039               | 0.208715             | 7      |
| Q86VV6     | Stimulator of interferon genes protein                     | 0.014639               | 0.237006             | 6      |
| Q14790     | Caspase-8                                                  | 0.011827               | 0.2194               | 6      |
| P25024     | C-X-C chemokine receptor type 1                            | 0.010408               | 0.239496             | 5      |
| Q13191     | E3 ubiquitin-protein ligase CBL-B                          | 0.010508               | 0.238095             | 5      |
| Q14164     | Inhibitor of nuclear factor kappa-B kinase subunit epsilon | 0.00502                | 0.209482             | 5      |
| Q03164     | Histone-lysine N-methyltransferase 2A                      | 0.011844               | 0.206972             | 5      |
| P06396     | Gelsolin                                                   | 0.013998               | 0.20014              | 5      |
| P40763     | Signal transducer and activator of transcription 3         | 0.005449               | 0.25266              | 4      |
| Q16236     | Nuclear factor erythroid 2-related factor 2                | 0.010508               | 0.233511             | 4      |
| P17535     | Transcription factor jun-D                                 | 0.00414                | 0.198468             | 4      |
| Q15078     | Cyclin-dependent kinase 5 activator 1                      | 0.040275               | 0.283865             | 3      |
| P13569     | Cystic fibrosis transmembrane conductance regulator        | 0.007011               | 0.238693             | 3      |
| Continued  |                                                            |                        |                      |        |
| P60900     | Proteasome subunit alpha type-6                            | 0.006862               | 0.235343             | 3      |
| Q30201     | Hereditary hemochromatosis protein                         | 0.024302               | 0.234279             | 3      |
| P35228     | Nitric oxide synthase, inducible                           | 0.007011               | 0.23332              | 3      |
| P49281     | Natural resistance-associated macrophage protein 2         | 0.007011               | 0.23332              | 3      |
| P55957     | BH3-interacting domain death agonist                       | 0.004674               | 0.209945             | 3      |
| P35869     | Aryl hydrocarbon receptor                                  | 0.007011               | 0.198399             | 3      |
