# Supplementary material
Source: PubMed Central journal article supplement (PMC8380804)

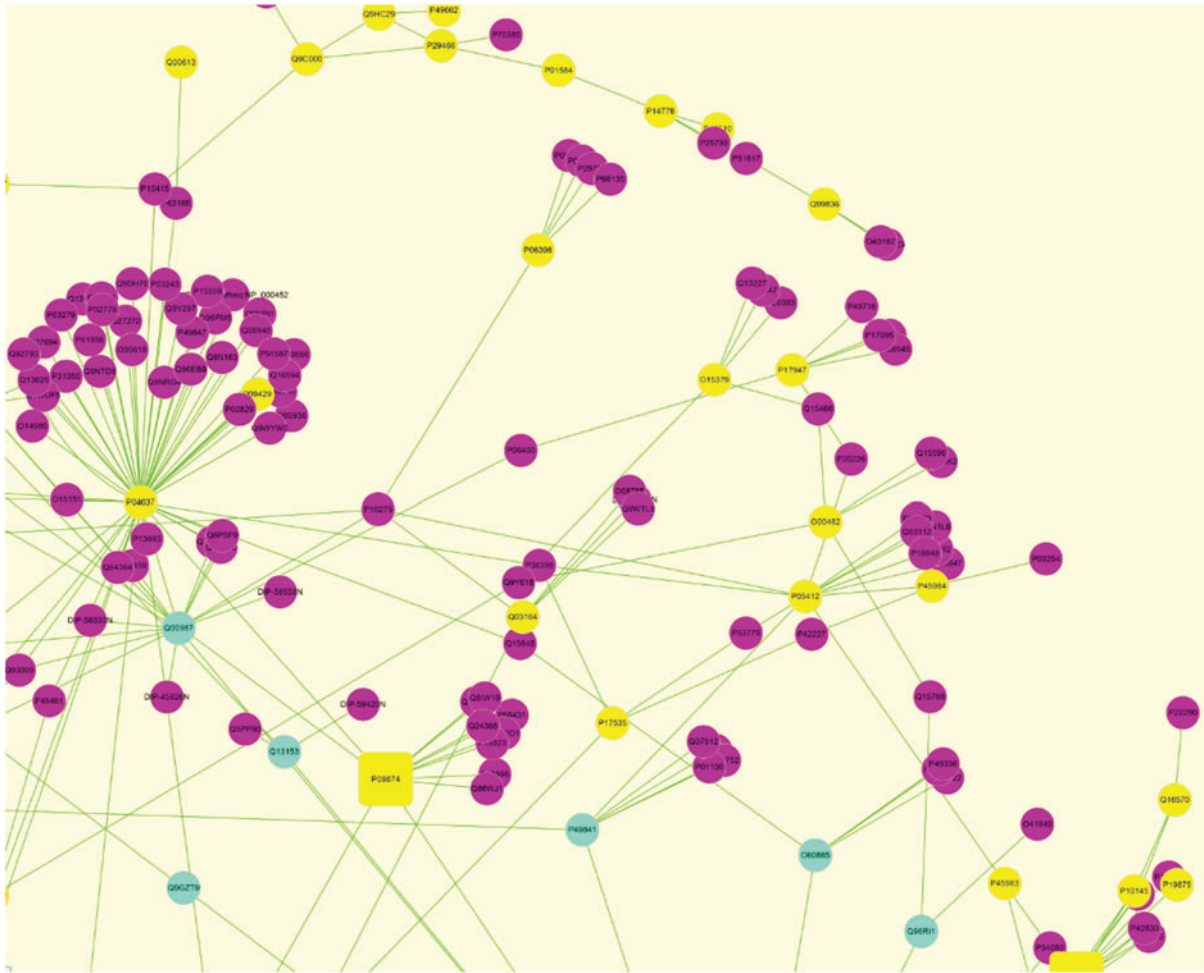

**SUPPLEMENTARY FIG. S3.** Enlarged view (ii) of Figure 1 “CBD-target-inflammation network.”

Supplement: Suppl_FigS3.pdf [file Suppl_FigS3.pdf]

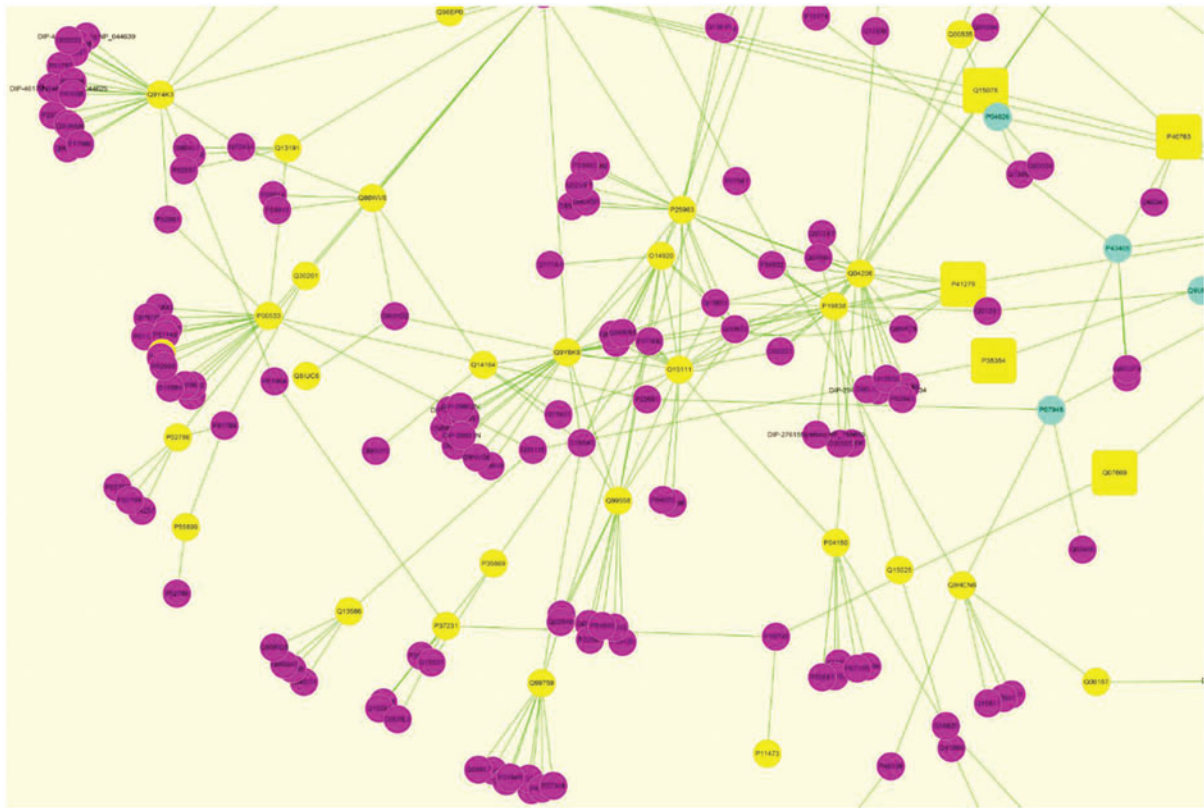

**SUPPLEMENTARY FIG. S4.** Enlarged view (iii) of Figure 1 “CBD-target-inflammation network.”

Supplement: Suppl_FigS4.pdf [file Suppl_FigS4.pdf]

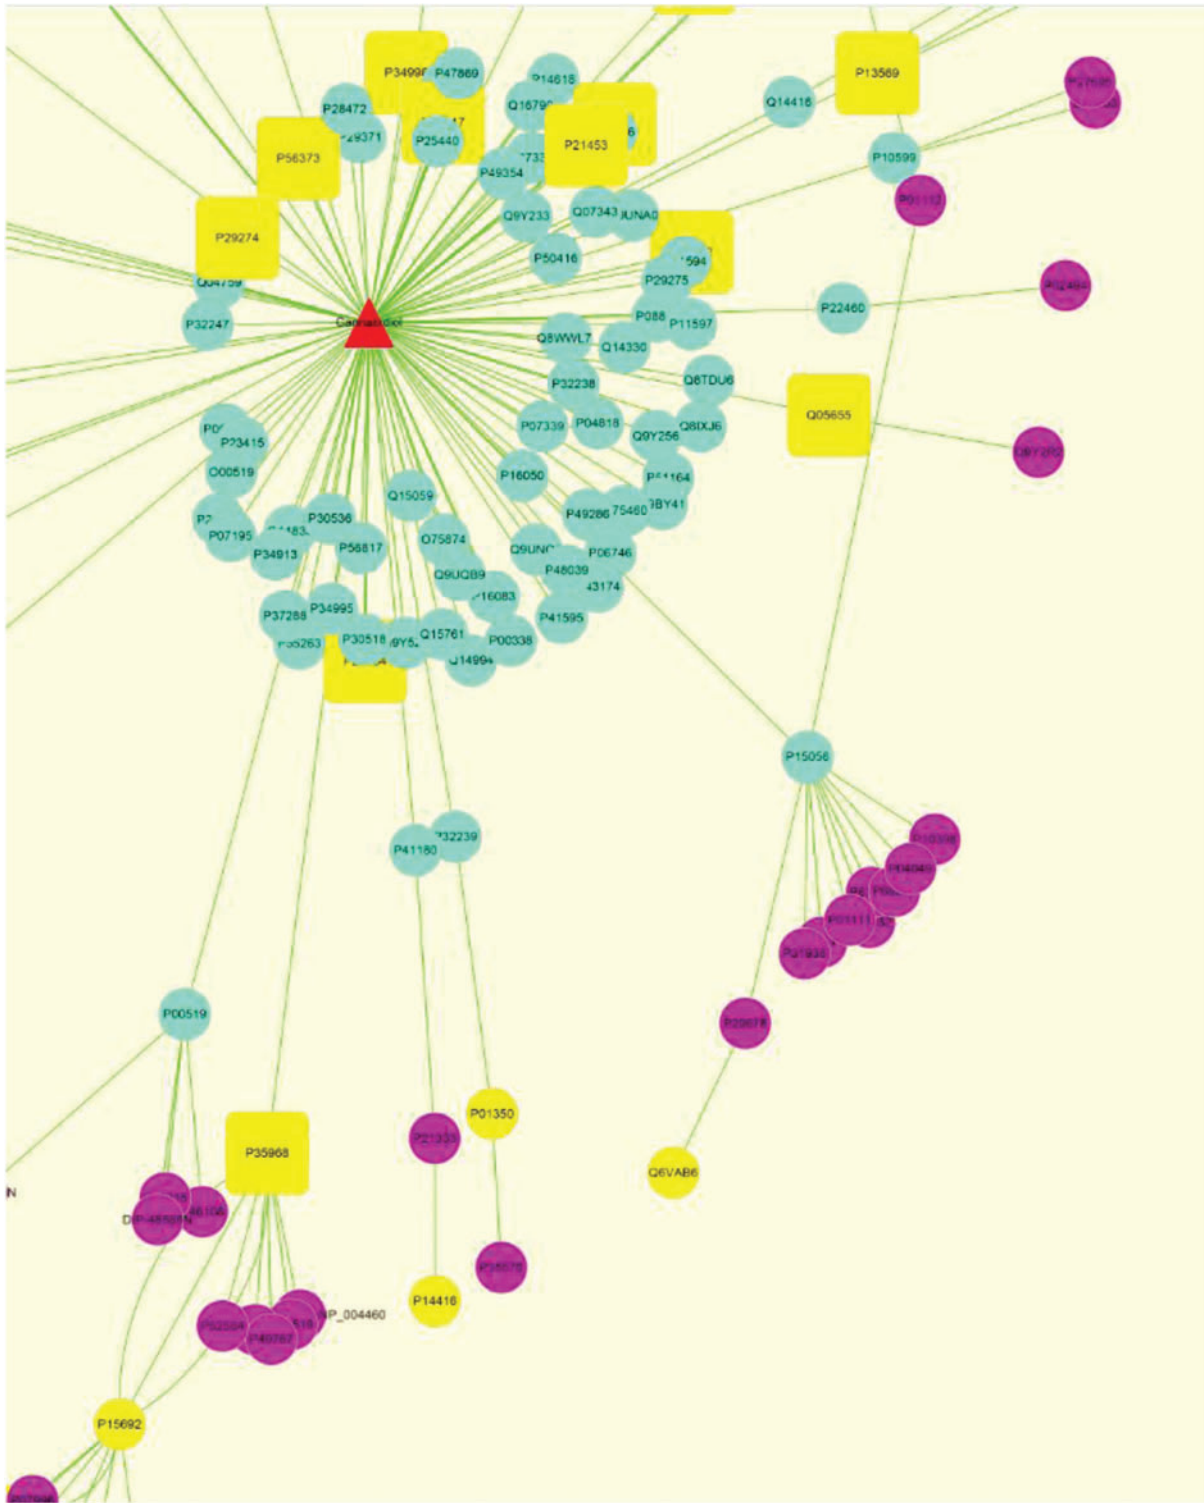

**SUPPLEMENTARY FIG. S5.** Enlarged view (iv) of Figure 1 “CBD-target-inflammation network.”

Supplement: Suppl_FigS5.pdf [file Suppl_FigS5.pdf]
